# Supplementary material for: Strengthening Global Disease Surveillance and Response through Field Epidemiology Training: Insights from Sri Lanka’s FETP-2025
Source: Research Square preprint supplement (doi:10.21203/rs.3.rs-7230814/v1), 2025-09-17
Supplement: Supplementary file 1 [file c6c9568ca69964eead8c449f.docx]

**ANNEX I**

**Recommendations and Comments by Participants on the Field Epidemiology Training Programme (FETP) Lectures**

| **Lecture** | **Participant comments** |
| --- | --- |
| Value of Epidemiology  & surveillance | Uncomfortable seating made it hard to concentrate on the lecture  Lecture was highly relevant to current context  It is a unique experience to learn from you  It would be clearer if examples were used with the case-based method  Oval seating caused neck strain; suggest small tables to enhance comfort and interaction |
| Descriptive Epidemiology | Better to make clinical colleges and medical faculties aware of surveillance case definitions |
| Disease frequency | Appreciated if CI/IR was calculated with participants  Difference between incidence and prevalence well understood  Very important and informative but too long |
| Measles | Content was very good and well organized, but the allocated time was insufficient  The session went too fast and needs more time. |
| Data analysis with Excel | It would be better to have more practical sessions on data analysis  The pace was too fast  The allocated time was insufficient to fully cover important analytical methods with the presenter  Extending the practical session time would improve effectiveness |
| Cold Chain Management | Very practical, very relevant  Understood the bimodal high temperature fridge tag caused by the printer not being ready before printing  Slide 12 is a great summary |
| AEFI surveillance | Better to include more case-based scenarios on AEFIs and surveillance with real-life examples |
| Pandemic preparedness | Better if include more discussion on real-life situational management and challenges to be addressed |
| Preparation for hospital visit | Better if the process of team objectives and individual roles is explained |
| Hospital visit | Allow longer hospital visits, preferably over multiple days, to enable thorough assessment of disease surveillance across wards  Include relevant ICNO/PHI in the visits and improve organization for better efficiency and time management |
| Presentation on hospital visit | Allocate more time for the Consultant Community Physician to discuss findings, recommendations, and MOH improvements.  Truly appreciate Nimal Sir’s guidance, which is of utmost value for better functioning at the divisional level. |
| Outbreak investigation practical | Better to Include more case studies and their outbreak responses in the discussion |
| Leptospirosis control | Better to include more case scenarios and real-life leptospirosis outbreak situations focusing on management challenges |
| Water Quality surveillance | Better including more case-based scenarios and exercises |
| Visit to MOH offices | The MOH visit discussion was valuable and highlighted crucial data often missed, prompting us to address shortcomings in our MOH areas  Provide a ready-made presentation template for ease and consistency |
| AFP | Include more real-world case discussions |
| IHR, Zoonotic diseases & one health | Include more case discussions on zoonotic outbreaks in Sri Lanka and how challenges were addressed |
| Visit to the Laboratory  (Role of laboratory in  outbreak investigation &  Response) | Better if visits to MRI laboratories are arranged for firsthand experience  Although the lecture gave useful insight on MRI, more detail on services and addressing gaps would be beneficial  Would appreciate laboratory visits and a comprehensive guide on surveillance procedures at MRI  Better if a session on sample quality issues for divisional-level action and discussion on interpreting food and water samples is included to enhance community-level work. |
